# Supplementary material for: Transcriptional regulation of HSPB1 by Friend leukemia integration-1 factor modulates radiation and temozolomide resistance in glioblastoma
Source: PubMed Central journal article supplement (PMC7138161; doi:10.18632/oncotarget.27425), 2020-03-31
Supplement: oncotarget-11-1097-s001.pdf [file oncotarget-11-1097-s001.pdf]

## Transcriptional regulation of HSPB1 by Friend leukemia integration-1 factor modulates radiation and temozolomide resistance in glioblastoma

### SUPPLEMENTARY MATERIALS

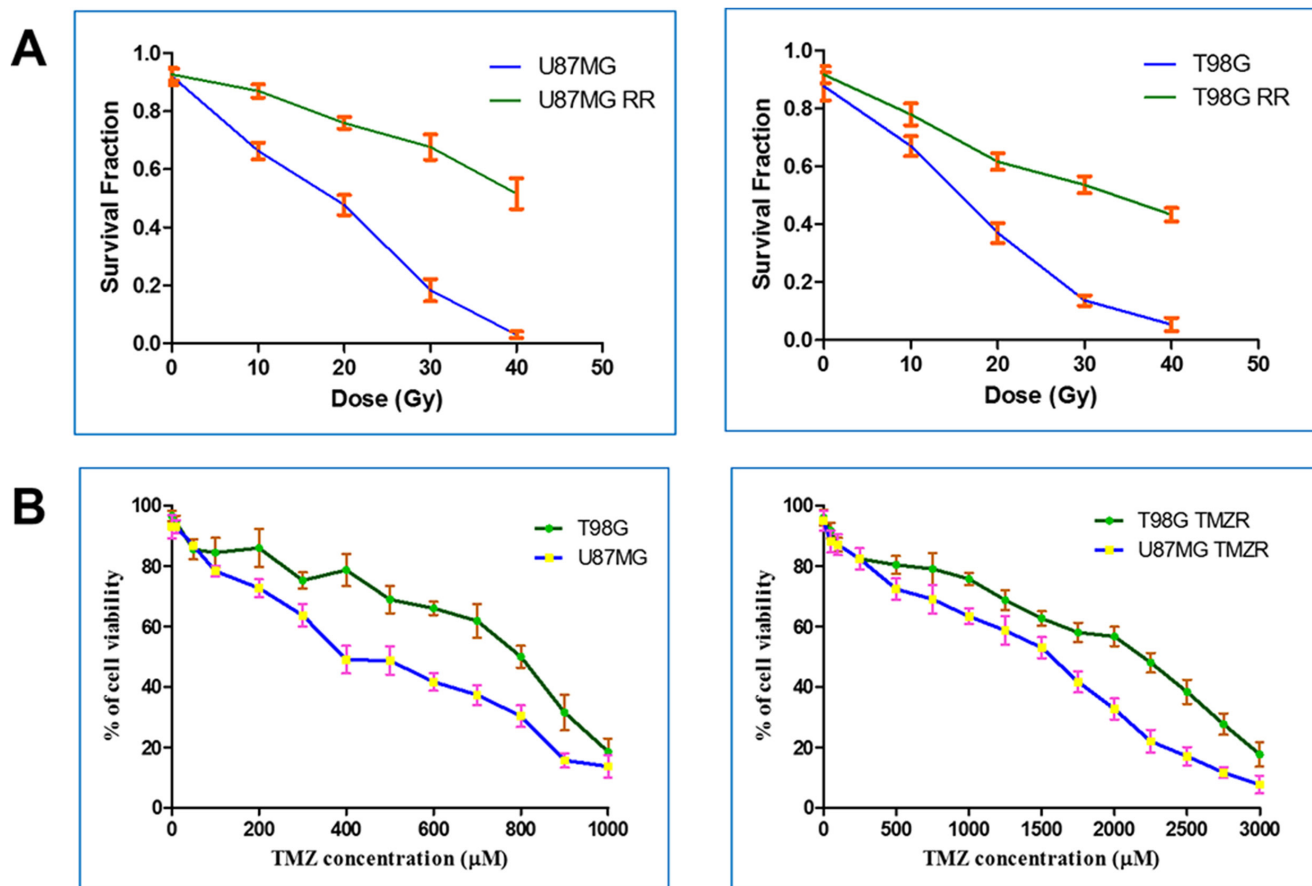

**Supplementary Figure 1:** (A) Determination of survival fraction in parental U87MG and T98G cells and radio-resistant U87MG RR and T98G RR cells. (B) Determination of IC50 of temozolomide (TMZ) in parental U87MG and T98G cells and TMZ-resistant U87MG TMZR and T98G TMZR cells.



| Identifier                      | Position | Mismatches | Score  | Binding Factor                                                                                   | Sequence    |
|---------------------------------|----------|------------|--------|--------------------------------------------------------------------------------------------------|-------------|
| <a href="#">ASSETS1_10</a>      | 2219 (+) | 0          | 100.00 | <a href="#">c-Ets-1</a>                                                                          | ACAGGAAGTC  |
| <a href="#">ELK1\$CONS_02</a>   | 2219 (+) | 0          | 90.91  | <a href="#">Elk-1</a>                                                                            | ACMGGAAGTNC |
| <a href="#">ASSCETS1P54_07</a>  | 2219 (+) | 0          | 100.00 | <a href="#">c-Ets-1 54</a>                                                                       | ACAGGAAGTC  |
| <a href="#">TCF2ALPHA\$CONS</a> | 2220 (+) | 0          | 87.50  | <a href="#">TCF-2alpha</a>                                                                       | SAGGAAGY    |
| <a href="#">FLI1\$CONS_01</a>   | 2220 (+) | 0          | 93.75  | <a href="#">Fli-1</a>                                                                            | CMGGAAGT    |
| <a href="#">MOUSE\$TIMP1_02</a> | 2220 (+) | 0          | 100.00 | <a href="#">c-Ets-1</a>                                                                          | CAGGAAG     |
| <a href="#">ASSELK1_13</a>      | 2220 (-) | 0          | 100.00 | <a href="#">Elk-1</a> , <a href="#">SAP-1a</a> ,<br><a href="#">SAP-1b</a> , <a href="#">SRF</a> | TTCCTG      |
| <a href="#">PEA3\$CONS</a>      | 2221 (+) | 0          | 91.67  | <a href="#">c-Ets-1 54</a> ,<br><a href="#">c-Ets-1 68</a> ,<br><a href="#">c-Ets-2 58-64</a> ,  | AGGAAR      |

```
seq( 2220.. 2279)      aggaagtccagactaattcaagtttgcggcatttgaggttcctggccagtgtttctttt
Segments:
1.1.3.0      2212 2221  p=
3.1.1.9      2217 2226  =K-2a==
3.5.2.0      2217 2226  Ets-1 =
1.6.1.0      2259 2268
1.3.1.2      2260 2269  =AP-2alph=
9.9.539      2261 2270  =====USF===
9.9.428      2270 2279  =====NF-1==
3.1.1.2      2272 2281  ===ISGF-3=
1.1.1.5      2273 2282  =====Antp
=====GCN=====
```

```
seq( 1740.. 1799)      atcccagccacttgggagctctgaggcaggaggatcgcttgaaccaggaggcggaggttg
Segments:
9.9.539      1732 1741  ==
1.1.3.0      1738 1747  /EBPalp=
1.1.1.1      1758 1767  ===c-Jun==
1.1.1.2      1759 1768  ===c-Fos==
9.9.29       1760 1769  ===AP-1==
1.2.1.0      1762 1771  =====E1===
1.2.2.0      1762 1771  ===MyoD==
3.5.2.0      1762 1771  =c-Ets-1 =
2.3.1.0      1786 1796  =====Sp1===
2.2.1.1      1797 1806  ==
```

```
seq( 4800.. 4859)      cctgtctggctctgtcctccttaacagaaggacggccttggccacgggcccacagccagca
Segments:
2.2.1.1      4817 4826  ===GATA-1=
3.5.2.0      4817 4826  ==c-Ets-1=
2.3.1.0      4828 4841  =====Sp1=====
2.3.1.0      4835 4848  =====Sp1=====
1.3.1.2      4836 4845  =====USF===
1.3.2.1      4836 4845  ===c-Myc==
1.3.2.2      4836 4845  ===Max1==
1.6.1.0      4836 4845  =AP-2alph=
9.9.539      4838 4847  =====NF-1==
2.3.1.0      4847 4856  =====Sp1=====
1.1.1.1      4852 4861  ===c-Jun
1.5.1        4852 4861  =====EF-C
```

Supplementary Figure 3: Prediction of Fli-1 transcription factor in 5 KB upstream region of HSPB1 using ALIBABA and PATCH detection software.



**Binding Site 3:**  
 TTAGCCGGTATGGTGCCACATGCCTGTAATCCAGCCACTTGGGAGTCT**GAGGCAGAG**GATCGCTGAACCCAGGAGCGGAGTTGCAGTGAAGCTGAGATTGCGCCA  
**Mutation:**  
 TTAGCCGGTATGGTGCCACATGCCTGTAATCCAGCCACTTGGGAGTCT**TGAAGTACAG**ATCGCTGAACCCAGGAGCGGAGTTGCAGTGAAGCTGAGATTGCGCCA  
**Binding Site 6:**  
 AGGCTGGAGTGCAGTGGCGCATCTCAGCTCCCAGCAACCTCGCCCTCT**GGAAT**GATCGCTCGCTCAGCTTCCCAGTAGCCGGGATTACAGGCCCCATC  
**Mutation:**  
 AGGCTGGAGTGCAGTGGCGCATCTCAGCTCCCAGCAACCTCGCCCTCT**TAGCT**GATCGCTCGCTCAGCTTCCCAGTAGCCGGGATTACAGGCCCCATC  
**Binding Site 7:**  
 TGCTTCTAA**GGA**AGATACATATAGTAGGAGATGTACAGTAATCTTCTCCTGGCCCCCTCAGCACTGTGCCATGGAGTCTGATCTGGGCCAGCTGCGCTGTTAGGGGAAGGG**GGA**AATGGCCAAA  
**Mutation:**  
 TGCTTCTAA**TACG**AGATACATATAGTAGGAGATGTACAGTAATCTTCTCCTGGCCCCCTCAGCACTGTGCCATGGAGTCTGATCTGGGCCAGCTGCGCTGTTAGGGGAAGGG**TACG**AATGGCCAAA

**Supplementary Figure 4: Sequence of ~120-bp upstream region of HSPB1 containing the mutated binding sites 3, 6 and 7 and the respective control oligonucleotides without mutations.**

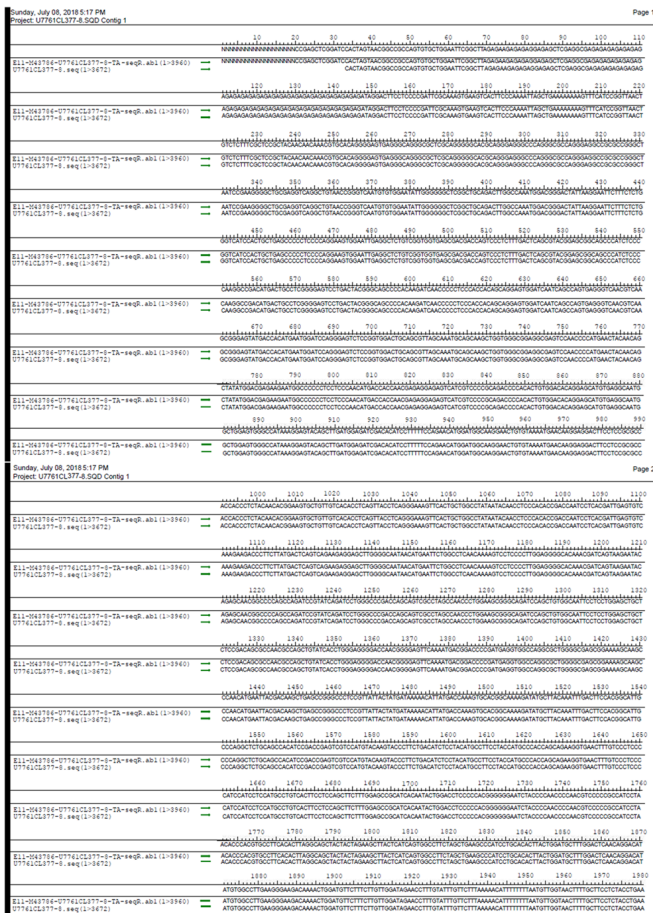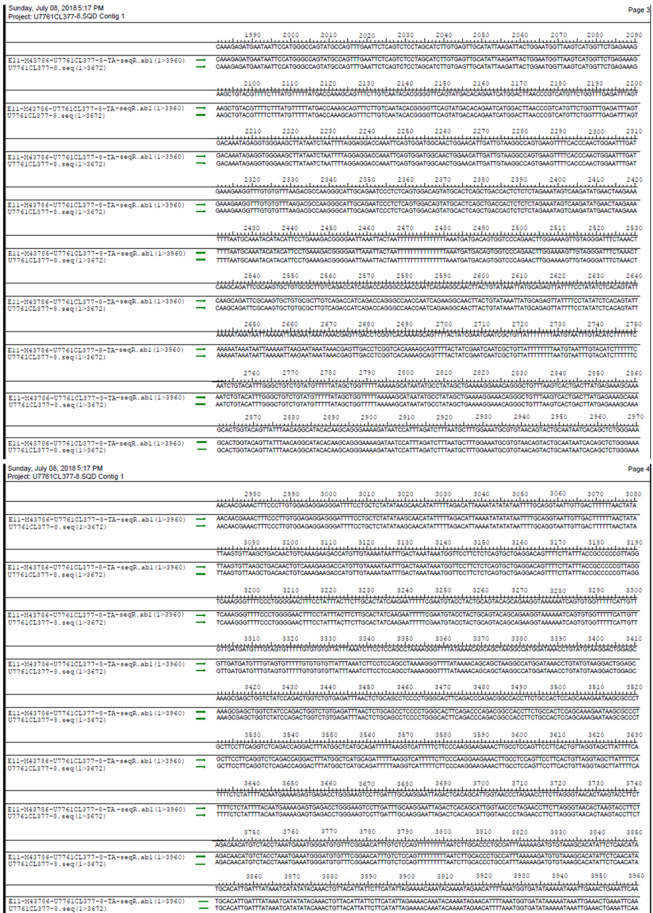

**Supplementary Figure 5: The sequencing data of the overexpressing Fl-1 plasmid.**

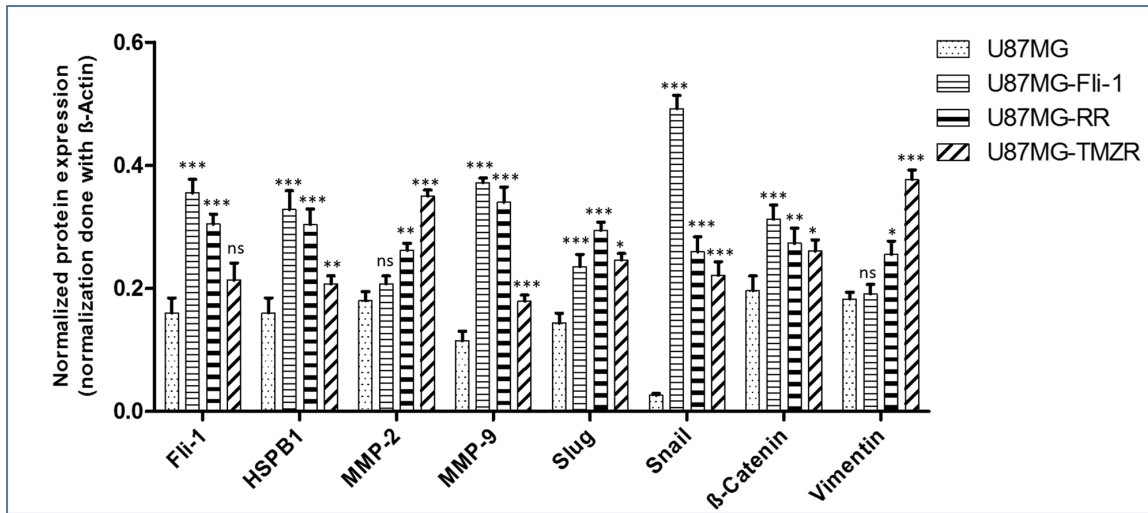

**Supplementary Figure 6: Densitometry plot of Figure 5C.** Western blotting analysis of Fli-1, HSPB1, MMP-2, MMP-9 and EMT proteins in U87MG, U87MG RR, TMZ-resistant U87MG and U87MG Fli-1 cells.

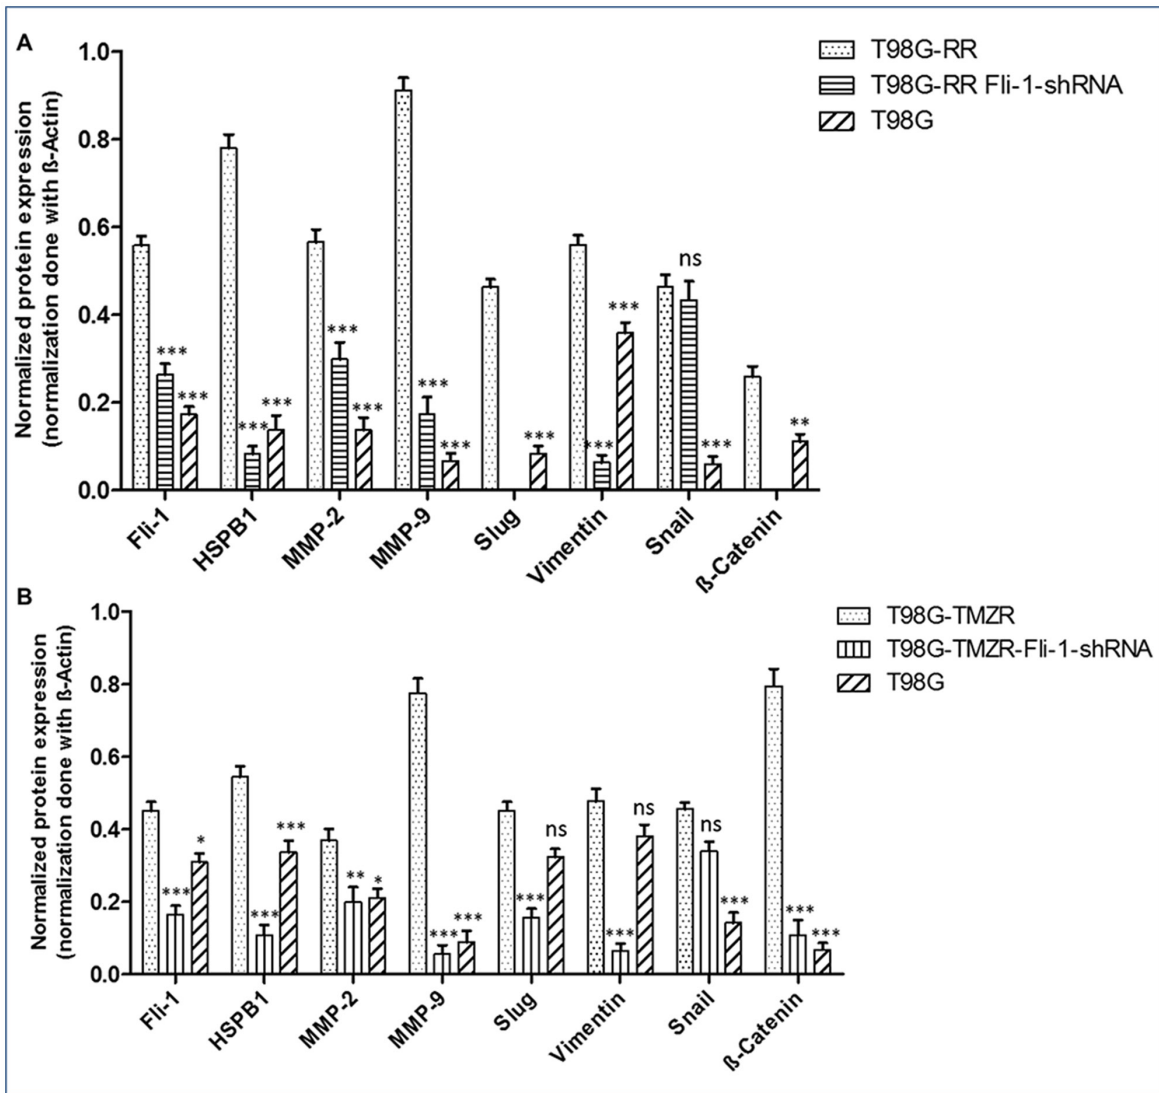

**Supplementary Figure 7: (A, B) Densitometry plot of Figure 6E and 6F.** Western blotting analysis of Fli-1, HSPB1, MMP-2, MMP-9 and EMT proteins in parental T98G, radio-resistant T98G RR, TMZ-resistant T98G, T98G RR Fli-1 shRNA and T98G TMZR Fli-1 shRNA cells. Each bar represents the average of three independent experiments. The level of significance is indicated by \* $P < 0.05$ , \*\* $P < 0.01$ , \*\*\* $P < 0.001$ .

**Supplementary Table 1: The primer sequences for qRT-PCR**

|                  | Primer Sequence (5'-3')                                 |
|------------------|---------------------------------------------------------|
| <b>HSPB1</b>     | F GAGACTGCCGCAAGTAAAG<br>R TTTGACAGGTGGTTGCTTTG         |
| <b>HSP 40</b>    | F GGAAGGGACCCATTTTCATT<br>R CCACTTCCAAAAGACGGAAA        |
| <b>HSP 70</b>    | F CCAGCTGAAGAAGGGTCAAG<br>R CAGGATCTGGATAGGGCAA         |
| <b>HSP 90</b>    | F AGACCCAGTCTTGTGGATGG<br>R ACTCCCCTTTCCCCCTAAAT        |
| <b>β-Catenin</b> | F TGCAGTTCGCCTTCACTATG<br>R ACTAGTCGTGGAATGGCACC        |
| <b>Slug</b>      | F TGTGTGGACTACCGCTGC<br>R TCCGAAAGAGGAGAGAGG            |
| <b>Snail</b>     | F TGCAGGACTCTAATCCAGAGTTTACC<br>R GTGGGATGGCTGCCAGC     |
| <b>Vimentin</b>  | F TGTCCAAATCGATGTGGATGTTTC<br>R TTGTACCATTCTTCTGCCTCCTG |

**Supplementary Table 2: The ChIP primer sequences for Fli-1 binding sites in the 5 kb upstream of HSPB1**

| Binding Site | Primer Sequence (5'-3')                                               |
|--------------|-----------------------------------------------------------------------|
| 1            | Forward: GTGTCTACAAAGGGCTGGCA<br>Reverse: CTGCTCACCTTGGCCCAG          |
| 2            | Forward: GGAGAGAGAGAAAGGCATTTATGA<br>Reverse: CCACTGAAGTCTTGCCCTG     |
| 3            | Forward: CGAAACCCCGTTTCTACTAAAA<br>Reverse: CTCACTCTATCACTCAGGCTGG    |
| 4            | Forward: CAACAATAAAACAGGGACCTAAGTC<br>Reverse: GGCTCCTATCTCCCAGCTTG   |
| 5            | Forward: TCTCCCTCTGTGATGTGGG<br>Reverse: GAAACACTGGCCAGGAACC          |
| 6            | Forward: GAGACAGAGTCTCGTTCTGTCAC<br>Reverse: TACAAAAAATTAGCCAGGTGTGAT |
| 7            | Forward: AACCAGTGCTTCTTAAGGAAAGATAC<br>Reverse: CCTGGGATTGAAGAGAGGG   |
| 8            | Forward: TGCAATGCATGACTGTTACCA<br>Reverse: TAGGCGTGTGGACTTTGAA        |
| 9            | Forward: TCACACGCGTGTGGT<br>Reverse: TGGAGCCGTGCCACG                  |
